# Supplementary material for: Mapping histone modifications in low cell number and single cells using antibody-guided chromatin tagmentation (ACT-seq)
Source: PubMed Central journal article supplement (PMC6702168; doi:10.1038/s41467-019-11559-1), 2019-08-20
Supplement: 41467_2019_11559_MOESM5_ESM.pdf [file 41467_2019_11559_MOESM5_ESM.pdf]

## **Legends for Supplementary Data Files**

### **Title: Supplementary Data 1**

**Description:** Mapping statistics for the iACT-seq single-cell sequencing libraries.

### **Title: Supplementary Data 2**

**Description:** Sequences of oligonucleotide barcodes used in this study.

### **Title: Supplementary Software**

**Description:** Code used to run the simulation for determining the numbers of theoretical cell doublets that were removed and that remain in the iACT-seq data set.
